# Supplementary material for: Measurement report: Formation of tropospheric brown carbon in a lifting air mass
Source: Copernicus journal article supplement (doi:10.5194/acp-24-9263-2024), 2024-08-26
Supplement: Supplementary file 1 [file acp-24-9263-2024-supplement.pdf]

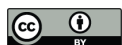

*Supplement of*

## **Measurement report: Formation of tropospheric brown carbon in a lifting air mass**

**Can Wu et al.**

*Correspondence to:* Si Zhang (szhang@geo.ecnu.edu.cn) and Gehui Wang (ghwang@geo.ecnu.edu.cn)

The copyright of individual parts of the supplement might differ from the article licence.

1 **S1. UV–vis light absorption measurement**

2 About 8 punches (12 cm<sup>3</sup>) from each filter sample was extracted three times under sonication  
3 with 15 ml Milli-Q pure water (18.2 MΩ), and the extract was subsequently filtered through  
4 0.45 μm PTFE pore syringe filter to remove the insoluble component in the suspension. A  
5 liquid waveguide capillary UV–vis spectrometer equipped with a 1 m long-effective path  
6 detection cell was applied to record the light absorption spectra of all extracts. The light  
7 absorption spectrum was finally converted into absorption coefficient (*abs*<sub>λ</sub>, M/m) at a  
8 particular wavelength (λ) using the following equation.

Eq.S1

$$abs_{\lambda} = (A_{\lambda} - A_{700}) \frac{v_1}{v_a \times l} \times \ln(10)$$

9 Where *A*<sub>λ</sub> and *A*<sub>700</sub> represent the light absorption of the extracts at wavelength λ and 700 nm,  
10 respectively. *V*<sub>1</sub> corresponds to the volume of the extract, e.g., 15 ml; *V*<sub>a</sub> refers to the volume of  
11 the air through corresponding to filter punches; *l* (m) is the absorbing path length. While, ln(10)  
12 is used for converting common logarithm that provided by the spectrophotometer to natural  
13 logarithm.

14  
15  
16  
17  
18  
19  
20

21  
22  
23

**Table S1** The result of bootstrap analysis.

| Sources                | Secondary formation | Fossil fuel combustion | Biomass burning | Fugitive dust | Unmapped |
|------------------------|---------------------|------------------------|-----------------|---------------|----------|
| Secondary formation    | 50                  | 0                      | 0               | 0             | 0        |
| Fossil fuel combustion | 1                   | 49                     | 0               | 0             | 0        |
| Biomass burning        | 0                   | 0                      | 50              | 0             | 0        |
| Fugitive dust          | 0                   | 5                      | 0               | 45            | 0        |

24  
25  
26  
27  
28

**Table S2** RF model performance for testing dataset.

|                | MF site | MS site |
|----------------|---------|---------|
| R <sup>2</sup> | 0.92    | 0.86    |
| MSE            | 0.003   | 0.008   |
| RMSE           | 0.054   | 0.091   |
| MAE            | 0.04    | 0.07    |

30 Note: MSE: mean square error; RMSE: root-mean-square error; MAE: mean absolute error.

31  
32  
33  
34

**Table S3.** Information and mass concentration ( $\mu\text{g m}^{-3}$ ) of nitroaromatic compounds detected in this study.

| Compounds                | Molecular weight | Formula                                       | CAS number | Abbreviation | MF site   | MS site     |
|--------------------------|------------------|-----------------------------------------------|------------|--------------|-----------|-------------|
| 4-Nitrophenol            | 139.11           | C <sub>6</sub> H <sub>5</sub> NO <sub>3</sub> | 100-02-7   | 4NP          | 2.6±2.6   | 0.40±0.25   |
| 3-Methoxy-4-nitrophenol  | 153.14           | C <sub>7</sub> H <sub>7</sub> NO <sub>3</sub> | 2581-34-2  | 3M4NP        | 0.07±0.05 | 0.01±0.01   |
| 4-Nitrocatechol          | 155.11           | C <sub>6</sub> H <sub>5</sub> NO <sub>4</sub> | 59030-13-6 | 4NC          | 1.6±2.5   | 0.25±0.67   |
| 4-Methyl-5-nitrocatechol | 169.13           | C <sub>7</sub> H <sub>7</sub> NO <sub>4</sub> | 68906-21-8 | 4M5NC        | 11.4±11.4 | 1.8±1.3     |
| 3-Nitrosalicylic acid    | 183.12           | C <sub>7</sub> H <sub>5</sub> NO <sub>5</sub> | 85038-1    | 3NSA         | 0.01±0.01 | 0.004±0.01  |
| 5-Nitrosalicylic acid    | 183.12           | C <sub>7</sub> H <sub>5</sub> NO <sub>5</sub> | 96-97-9    | 5NSA         | 0.13±0.13 | 0.012±0.015 |

37  
38  
39  
40  
41  
42  
43

44  
45  
46

**Table S4** NH<sub>3</sub> concentrations in different regions of China

| Region     | Location          | Period                          | Ammonia ( $\mu\text{g m}^{-3}$ ) | Reference           |
|------------|-------------------|---------------------------------|----------------------------------|---------------------|
| NCP        | Beijing           | Summer of 2009                  | 29.4±11.9                        | Meng et al. (2017)  |
|            |                   | Mar.2016-May.2017               | 22.2±12.8                        | Kuang et al. (2020) |
|            | Gucheng           | May-Sep 2013                    | 27.5±42.8                        | Meng et al. (2018)  |
|            | Luancheng         | Dec.2015-Feb.2016               | 17.2                             | Pan et al. (2018)   |
| Cangzhou   | Dec.2015-Feb.2016 | 22.2                            |                                  |                     |
| FWP        | Xi'an             | Winter of 2016                  | 29±7.3                           | Wu et al. (2020a)   |
|            |                   | Summer of 2016                  | 38±9.4                           |                     |
|            | Weinan            | 2006-2007                       | 12.9                             | Cao et al. (2009)   |
|            |                   | Dec.2015-Feb.2016               | 12.4                             | Pan et al. (2018)   |
|            |                   | Summer of 2020                  | 3.1±1.9                          | Wu et al. (2022)    |
| Mt. Hua-MF | Summer of 2020    | 27.3±51                         |                                  |                     |
| YRD        |                   | Autumn of 2019                  | 9.5                              | Wu et al. (2023)    |
|            |                   | July-Dec 2013,<br>Mar-June 2014 | 9.4±6.9                          | Wang et al. (2015)  |
|            | Shanghai          | Dec.2019-Jan.2020               | 9.3±4.0                          | Lv et al. (2022)    |
|            | Nanjing           | Dec.2015-Feb.2016               | 10.8                             | Pan et al. (2018)   |
|            | Taihu             | Dec.2015-Feb.2016               | 6.3                              |                     |
|            | Lin'an            | Sep 2009-Dec 2010               | 12.5±8.5                         | Meng et al. (2014)  |
| PRD        | Guangzhou         | Dec.2015-Feb.2016               | 5.8                              | Pan et al. (2018)   |
|            |                   | Oct-Nov 2004                    | 7.3±6.2                          | Hu et al. (2008)    |
|            | Dinghushan        | Dec.2015-Feb.2016               | 2.8                              | Pan et al. (2018)   |
|            | Maoming           | Dec.2015-Feb.2016               | 9.8                              |                     |
| Hongkong   | Autumn 2000       | 2.3±2.7                         | Yao et al. (2006)                |                     |
| TP         | Lhasa             | Dec.2015-Feb.2016               | 4.8                              | Pan et al. (2018)   |
|            | Ali               | Dec.2015-Feb.2016               | 1.7                              |                     |

47 Note: In some cities, the NH<sub>3</sub> unit is ppb, which was converted by the formula of standard atmospheric  
48 pressure and normal temperature in this study. The abbreviations of NCP, FWP, YRD, PRD and TP indicate  
49 North China Plain, Fen-wei Plain, Yangtze River Delta, Pearl River Delta and Tibet Plateau, respectively.

50  
51  
52

53 **Table S5** MAE<sub>365</sub> of water-soluble BrC in PM<sub>2.5</sub> among different cities in the world.

| Region        | Location     | Year      | Season      | MAE <sub>365</sub> (m <sup>2</sup> g <sup>-1</sup> ) | Reference                     |
|---------------|--------------|-----------|-------------|------------------------------------------------------|-------------------------------|
| NCP,<br>China | Beijing      | 2011      | Winter      | 1.2±0.1                                              | Cheng et al. (2016)           |
|               |              | 2010-2011 | Winter      | 1.26                                                 | Du et al. (2014)              |
|               |              | 2010-2011 | Summer      | 0.51                                                 |                               |
|               | Xingtai      | 2018-2019 | Spring      | 1.4±0.18                                             | Li et al. (2023a)             |
|               |              |           | Summer      | 0.95±0.18                                            |                               |
|               |              | Autumn    | 1.5±0.13    |                                                      |                               |
|               |              | Winter    | 1.9±0.16    |                                                      |                               |
|               | Jinan (TSP)  | 2016      | Spring      | 1.00±0.23                                            | Wen et al. (2021)             |
|               | Zhangbei     | 2016      | Spring      | 1.32±0.34                                            |                               |
|               | Tianjin      | 2016–2017 | Winter      | 1.54±0.33                                            | Deng et al. (2022)            |
| Summer        |              |           | 0.84±0.22   |                                                      |                               |
| FWP,<br>China | Xi'an        | 2016–2017 | Winter      | 1.2±0.06                                             | Wu et al. (2020b)             |
|               |              | Summer    | 1.1±0.2     | Li et al. (2023b)                                    |                               |
|               | 2020         | Winter    | 0.78 ± 0.96 |                                                      |                               |
|               | Licun        | 2017      | Winter      | 0.94±0.28                                            | Li et al. (2020)              |
|               |              |           | Summer      | 1.01±0.18                                            |                               |
|               | Mt. Hua-MS   | 2016      | Summer      | 0.69±0.2                                             | This study                    |
| Mt. Hua-MF    | 0.67±0.21    |           |             |                                                      |                               |
| YRD,<br>China | Changzhou    | 2018      | Winter      | 0.74                                                 | Tao et al. (2021)             |
|               | Yangzhou     | 2015-2016 | Annual      | 0.75 ± 0.29                                          | Chen et al. (2020)            |
|               |              |           | Spring      | 0.69                                                 |                               |
|               |              |           | Summer      | 0.51                                                 |                               |
|               | Nanjing      | 2015-2016 | Autumn      | 0.55                                                 | Chen et al. (2018)            |
|               |              |           | Winter      | 1.04                                                 |                               |
| Shanghai      | 2018-2019    | Winter    | 1.18±0.42   | Zhao et al. (2021)                                   |                               |
| PRD,<br>China | Guangzhou    | 2012      | Winter      | 0.81                                                 | Liu et al. (2018)             |
|               |              | 2018      | Winter      | 1.0 ± 0.21                                           | Zou et al. (2023)             |
|               |              | 2019      | Winter      | 0.34                                                 | Wang et al. (2022)            |
|               |              | 2016      | Autumn      | 0.60±0.06                                            | He et al. (2023)              |
|               | Taipei       | 2021      | Annual      | 0.86±0.60                                            | Ting et al. (2022)            |
| TP,<br>China  | Lulang       | 2015-2016 | Winter      | 0.75 ± 0.13                                          | Zhu et al. (2018)             |
|               | Lhasa        | 2013-2014 | Annual      | 0.74                                                 | Li et al. (2016)              |
|               |              |           | Summer      | 0.27 ± 0.10                                          |                               |
|               | Southeast TP | 2013-2014 | Winter      | 0.86 ± 0.17                                          | Wu et al. (2020c)             |
|               |              |           | Summer      | 0.38±0.16                                            |                               |
| Nam Co        | 2015         | Summer    | 0.38±0.16   | Zhang et al. (2017)                                  |                               |
| India         | Delhi        | 2016      | Spring      | 2.5                                                  | Dasari et al. (2019)          |
| Korea         | Seoul        | 2012-2013 | Winter      | 1.02                                                 | Kim et al. (2016)             |
|               |              |           | Summer      | 0.28                                                 |                               |
| USA           | Los Angeles  | 2018-2019 | Winter      | 0.7±0.2                                              | Soleimanian et al. (2020)     |
|               |              |           | Summer      | 0.5±0.2                                              |                               |
|               | Yorkville    | 2010      | Winter      | 0.41                                                 | Hecobian et al. (2010)        |
| Switzerland   |              | 2013      | Summer      | 0.29                                                 | Xie et al. (2019)             |
|               |              |           | Winter      | 0.9                                                  |                               |
| Greece        | Ioannina     | 2019      | Summer      | 0.3 ± 0.1                                            | Paraskevopoulou et al. (2023) |
|               |              |           | Summer      | 0.28                                                 |                               |

55  
56  
57  
58  
59  
60  
61  
62  
63

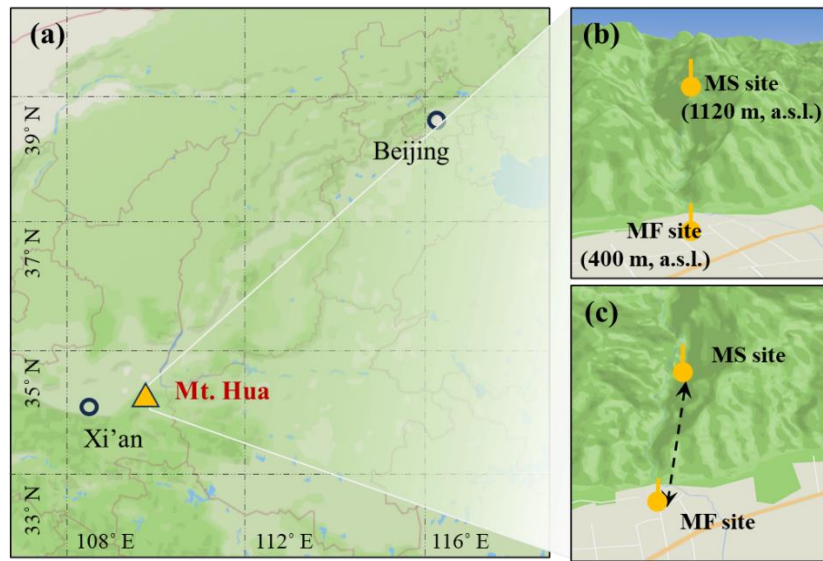

64  
65  
66  
67  
68  
69

**Figure S1.** Locations of the sampling sites in China. **(a)** Topographic view, **(b)** vertical view and bird's-eye view **(c)** of Mt. Hua with the sampling sites marked. The maps are the reproductions from ©Mapbox (<https://account.mapbox.com/>, last access: 16 March 2024)

70  
71  
72

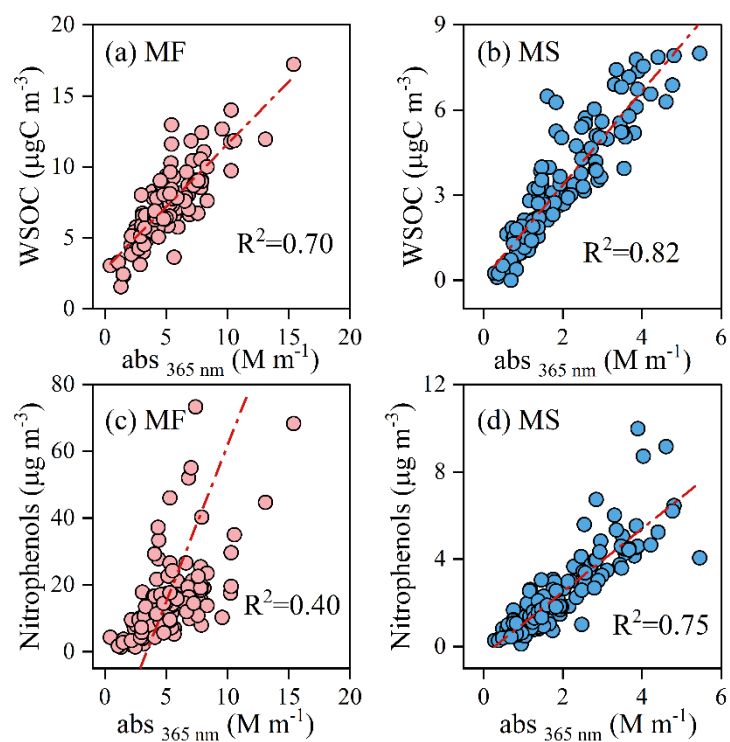

73  
74  
75  
76  
77  
78

**Figure S2.** Linear fit regression analysis for Abs<sub>λ=365 nm</sub> with WSOC and nitrophenols at MF and MS sites

79  
80

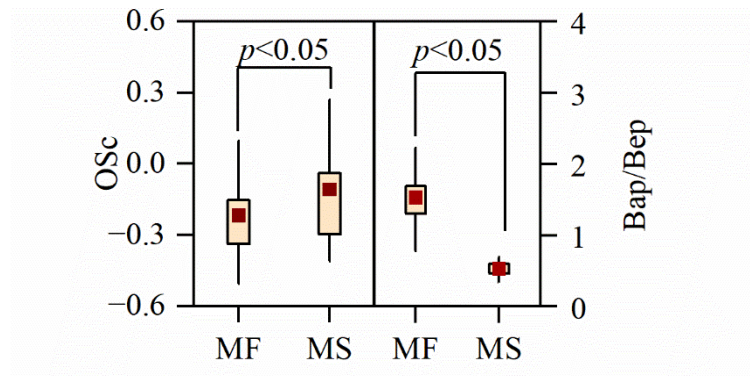

81  
82  
83  
84  
85  
86

**Figure S3** Comparison of OSc and BaP/BeP ratio among both sampling sites. The whisker boxes show mean (square), 25<sup>th</sup>–75<sup>th</sup> percentile ranges (box), and standard deviation values (whiskers)

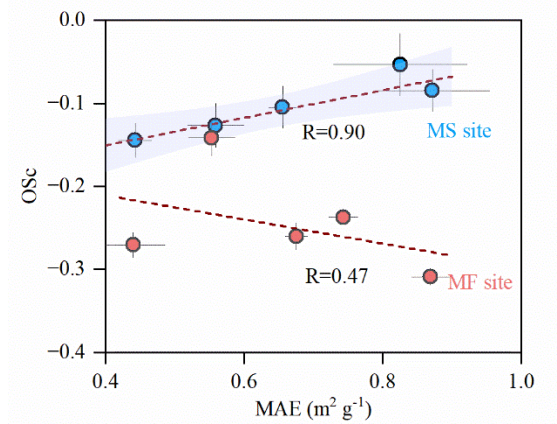

87  
88  
89  
90  
91  
92  
93

**Figure S4.** The correlativity between MAE<sub>365nm</sub> and OSc value at both sampling sites.



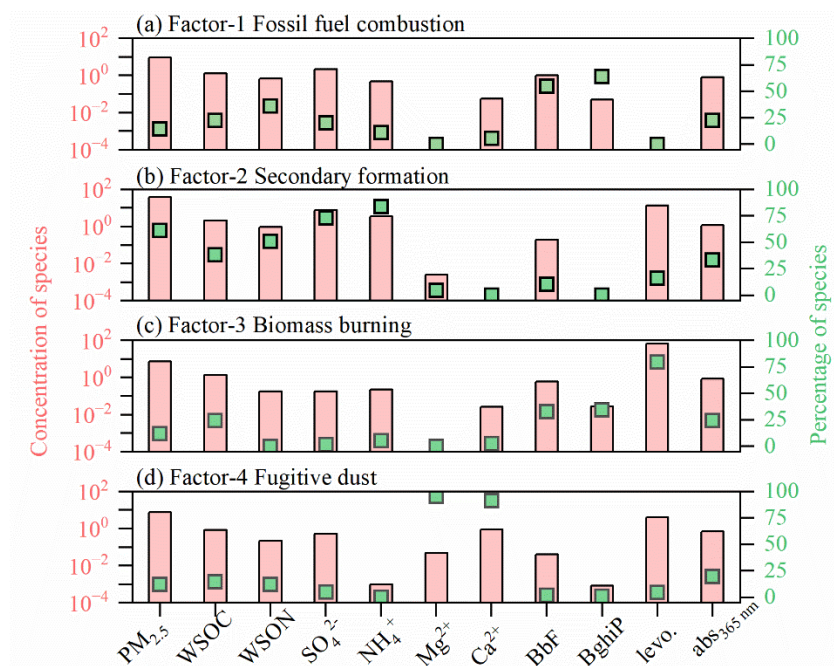

94  
95  
96  
97  
98

**Figure S5.** Source apportionment for light absorption of daytime water-soluble BrC ( $abs_{365\text{ nm}}$ ) of all the daytime samples collected during the whole campaign.

99  
100  
101

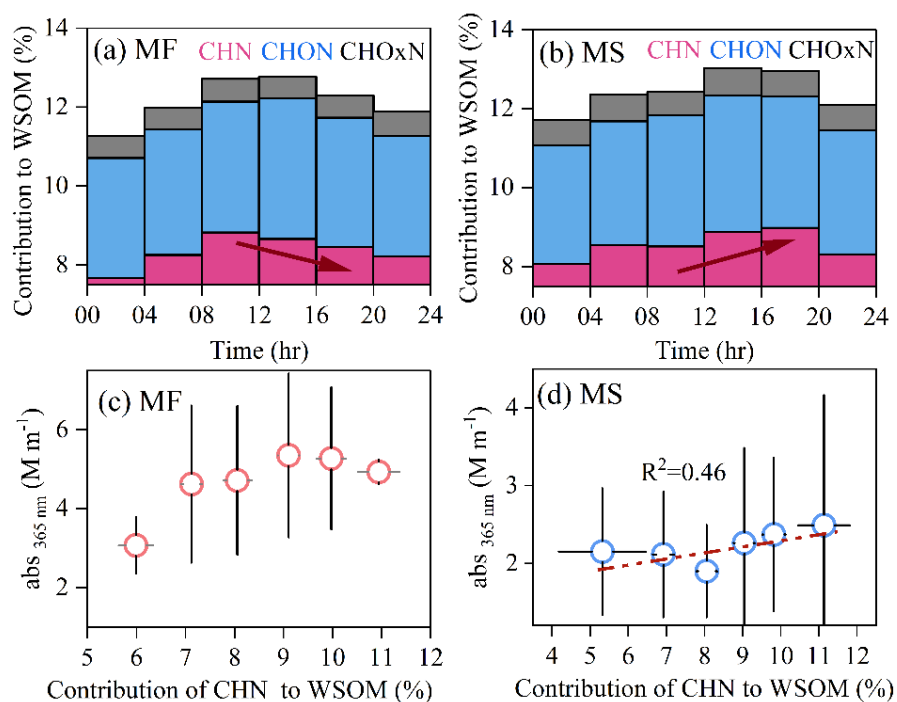

102  
103  
104  
105  
106  
107  
108  
109  
110

**Figure S6.** (a) and (b) Diurnal variations in relative contributions of nitrogen-containing organic fragments to WSOM at MF and MS sites, respectively. (c and d) The dependence of light absorption of WSOC ( $\text{Abs}_{\lambda=365 \text{ nm}}$ ) on the relative contributions of CHN fragments to WSOM at the two sampling sites.

111  
112  
113  
114  
115  
116  
117

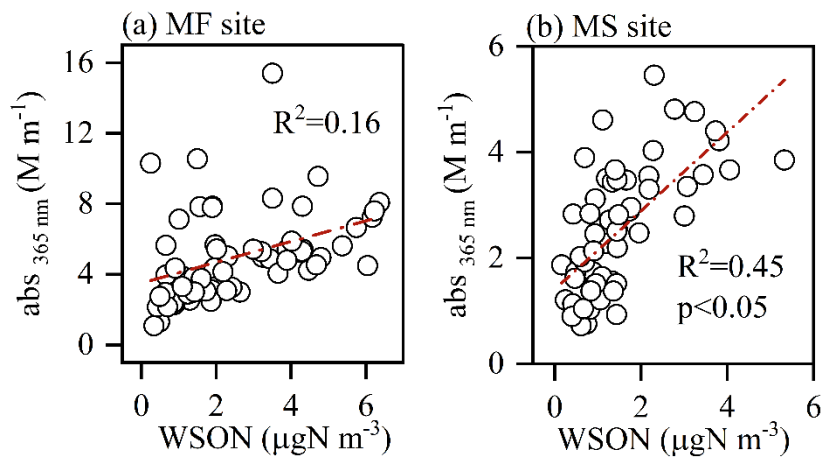

118  
119  
120

**Figure S7** Linear fit regression analysis for  $\text{Abs}_{\lambda=365 \text{ nm}}$  and WSON of the daytime samples at two sites

121  
122  
123  
124  
125  
126  
127  
128  
129  
130

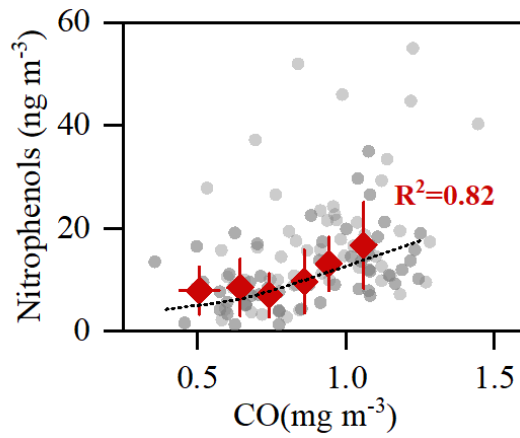

131  
132  
133  
134  
135  
136  
137

**Figure S8** A correlation analysis of CO and NACs at MF site.

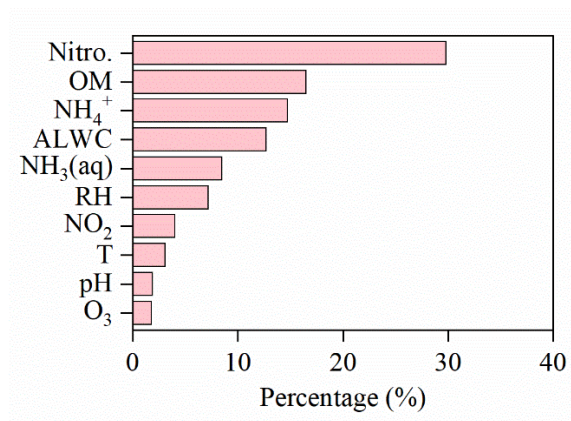

138  
139  
140  
141  
142

**Figure S9** Importance assessment for the key factors affecting the daytime WSON at MF site.

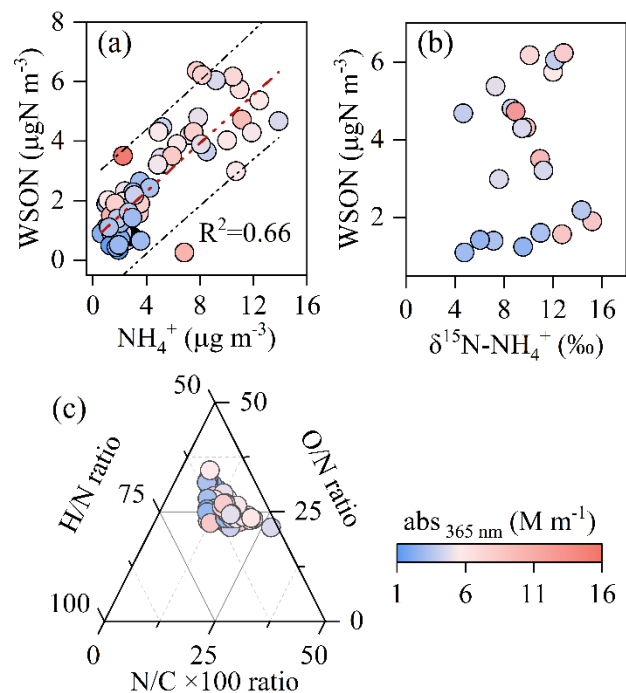

143  
 144  
 145  
 146  
 147  
 148  
 149  
 150

**Figure S10** Impacts on WSON formation at MF site. Linear fit regressions for WSON with  $\text{NH}_4^+ + \text{NH}_3(\text{aq})$  (a) and  $\delta^{15}\text{N-NH}_4^+$  (b) at MF site and triangular chart for the elemental ratios of N/C, H/N and O/N of WSOC at MF site (c).

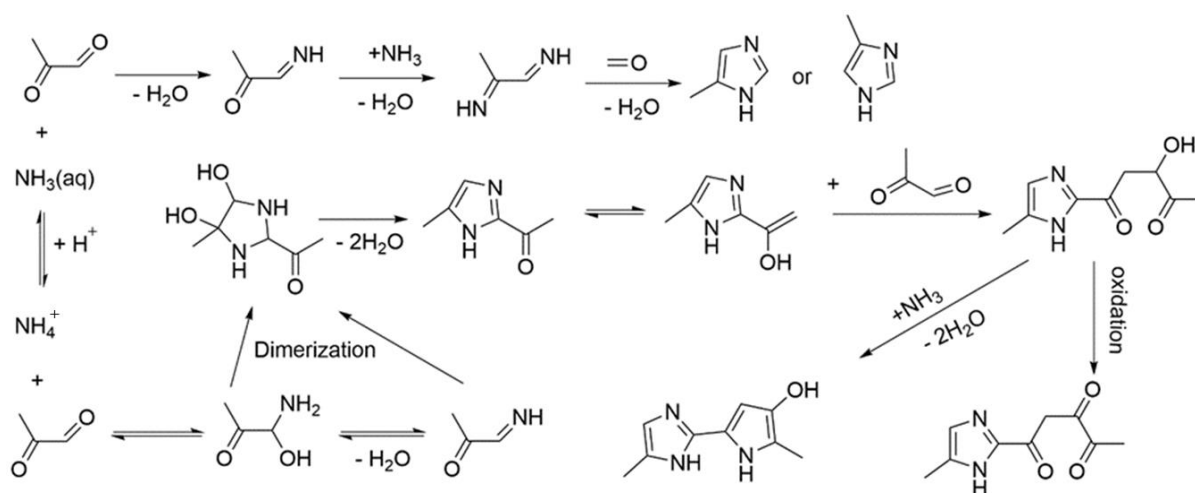

151  
 152  
 153  
 154

**Figure S11** Simple reaction paths for imidazoles or N-heterocycles (Modified from Aiona et al. (2017) and Jang et al. (2013)).

155

**References**

- 156 Aiona, P. K., Lee, H. J., Leslie, R., Lin, P., Laskin, A., Laskin, J., and Nizkorodov, S. A.: Photochemistry of  
 157 Products of the Aqueous Reaction of Methylglyoxal with Ammonium Sulfate, *ACS Earth Space Chem.*, 1,  
 158 522-532, 10.1021/acsearthspacechem.7b00075, 2017.
- 159 Cao, J.-J., Zhang, T., Chow, J. C., Watson, J. G., Wu, F., and Li, H.: Characterization of Atmospheric Ammonia  
 160 over Xi'an, China, *Aerosol Air Qual. Res.*, 9, 277-289, 2009.
- 161 Chen, Y., Ge, X., Chen, H., Xie, X., Chen, Y., Wang, J., Ye, Z., Bao, M., Zhang, Y., and Chen, M.: Seasonal light  
 162 absorption properties of water-soluble brown carbon in atmospheric fine particles in Nanjing, China, *Atmos.*  
 163 *Environ.*, 187, 230-240, 10.1016/j.atmosenv.2018.06.002, 2018.
- 164 Chen, Y., Xie, X., Shi, Z., Li, Y., Gai, X., Wang, J., Li, H., Wu, Y., Zhao, X., Chen, M., and Ge, X.: Brown carbon  
 165 in atmospheric fine particles in Yangzhou, China: Light absorption properties and source apportionment,  
 166 *Atmos. Res.*, 244, 10.1016/j.atmosres.2020.105028, 2020.
- 167 Cheng, Y., He, K.-b., Du, Z.-y., Engling, G., Liu, J.-m., Ma, Y.-l., Zheng, M., and Weber, R. J.: The characteristics  
 168 of brown carbon aerosol during winter in Beijing, *Atmos. Environ.*, 127, 355-364,  
 169 10.1016/j.atmosenv.2015.12.035, 2016.
- 170 Dasari, S., Andersson, A., Bikkina, S., Holmstrand, H., Budhavant, K., Satheesh, S., Asmi, E., Kesti, J., Backman,  
 171 J., Salam, A., Bisht, D. S., Tiwari, S., Hameed, Z., and Gustafsson, O.: Photochemical degradation affects the  
 172 light absorption of water-soluble brown carbon in the South Asian outflow, *Science Advances*, 5,  
 173 10.1126/sciadv.aau8066, 2019.
- 174 Deng, J., Ma, H., Wang, X., Zhong, S., Zhang, Z., Zhu, J., Fan, Y., Hu, W., Wu, L., Li, X., Ren, L., Pavuluri, C. M.,  
 175 Pan, X., Sun, Y., Wang, Z., Kawamura, K., and Fu, P.: Measurement report: Optical properties and sources of  
 176 water-soluble brown carbon in Tianjin, North China insights from organic molecular compositions, *Atmos.*  
 177 *Chem. Phys.*, 22, 6449-6470, 10.5194/acp-22-6449-2022, 2022.
- 178 Du, Z., He, K., Cheng, Y., Duan, F., Ma, Y., Liu, J., Zhang, X., Zheng, M., and Weber, R.: A yearlong study of  
 179 water-soluble organic carbon in Beijing II: Light absorption properties, *Atmospheric Environment*, 89, 235-  
 180 241, 2014.
- 181 He, T., Wu, Y., Wang, D., Cai, J., Song, J., Yu, Z., Zeng, X., and Peng, P. a.: Molecular compositions and optical  
 182 properties of water-soluble brown carbon during the autumn and winter in Guangzhou, China, *Atmos.*  
 183 *Environ.*, 296, 10.1016/j.atmosenv.2022.119573, 2023.
- 184 Hecobian, A., Zhang, X., Zheng, M., Frank, N., Edgerton, E. S., and Weber, R. J.: Water-Soluble Organic Aerosol  
 185 material and the light-absorption characteristics of aqueous extracts measured over the Southeastern United  
 186 States, *Atmos. Chem. Phys.*, 10, 5965-5977, 10.5194/acp-10-5965-2010, 2010.
- 187 Hu, M., Wu, Z., Slanina, J., Lin, P., Liu, S., and Zeng, L.: Acidic gases, ammonia and water-soluble ions in PM<sub>2.5</sub>  
 188 at a coastal site in the Pearl River Delta, China, *Atmos. Environ.*, 42, 6310-6320,  
 189 10.1016/j.atmosenv.2008.02.015, 2008.
- 190 Jang, H. W., Jiang, Y., Hengel, M., and Shibamoto, T.: Formation of 4(5)-Methylimidazole and Its Precursors,  $\alpha$ -  
 191 Dicarbonyl Compounds, in *Maillard Model Systems*, *J. Agric. Food. Chem.*, 61, 6865-6872,  
 192 10.1021/jf401958w, 2013.
- 193 Kim, H., Kim, J. Y., Jin, H. C., Lee, J. Y., and Lee, S. P.: Seasonal variations in the light-absorbing properties of  
 194 water-soluble and insoluble organic aerosols in Seoul, Korea, *Atmos. Environ.*, 129, 234-242,  
 195 10.1016/j.atmosenv.2016.01.042, 2016.
- 196 Kuang, Y., Xu, W., Lin, W., Meng, Z., Zhao, H., Ren, S., Zhang, G., Liang, L., and Xu, X.: Explosive morning  
 197 growth phenomena of NH<sub>3</sub> on the North China Plain: Causes and potential impacts on aerosol formation,  
 198 *Environ. Pollut.*, 257, 10.1016/j.envpol.2019.113621, 2020.

199 Li, C., Chen, P., Kang, S., Yan, F., Hu, Z., Qu, B., and Sillanpaa, M.: Concentrations and light absorption  
200 characteristics of carbonaceous aerosol in PM<sub>2.5</sub> and PM<sub>10</sub> of Lhasa city, the Tibetan Plateau, *Atmos.*  
201 *Environ.*, 127, 340-346, 10.1016/j.atmosenv.2015.12.059, 2016.

202 Li, D., Wu, C., Zhang, S., Lei, Y., Lv, S., Du, W., Liu, S., Zhang, F., Liu, X., Liu, L., Meng, J., Wang, Y., Gao, J.,  
203 and Wang, G.: Significant coal combustion contribution to water-soluble brown carbon during winter in  
204 Xingtai, China: Optical properties and sources, *J. Environ. Sci.*, 124, 892-900, 10.1016/j.jes.2022.02.026,  
205 2023a.

206 Li, J., Zhang, Q., Wang, G., Li, J., Wu, C., Liu, L., Wang, J., Jiang, W., Li, L., Ho, K. F., and Cao, J.: Optical  
207 properties and molecular compositions of water-soluble and water-insoluble brown carbon (BrC) aerosols in  
208 northwest China, *Atmos. Chem. Phys.*, 20, 4889-4904, 10.5194/acp-20-4889-2020, 2020.

209 Li, X., Yu, F., Song, Y., Zhang, C., Yan, F., Hu, Z., Lei, Y., Tripathee, L., Zhang, R., Guo, J., Wang, Y., Chen, Q.,  
210 Liu, L., Cao, J., and Wang, Q.: Water-soluble brown carbon in PM<sub>2.5</sub> at two typical sites in Guanzhong Basin:  
211 Optical properties, sources, and implications, *Atmos. Res.*, 281, 10.1016/j.atmosres.2022.106499, 2023b.

212 Liu, J., Mo, Y., Ding, P., Li, J., Shen, C., and Zhang, G.: Dual carbon isotopes (C-14 and C-13) and optical  
213 properties of WSOC and HULIS-C during winter in Guangzhou, China, *Sci. Total Environ.*, 633, 1571-1578,  
214 10.1016/j.scitotenv.2018.03.293, 2018.

215 Lv, S., Wang, F., Wu, C., Chen, Y., Liu, S., Zhang, S., Li, D., Du, W., Zhang, F., Wang, H., Huang, C., Fu, Q.,  
216 Duan, Y., and Wang, G.: Gas-to-Aerosol Phase Partitioning of Atmospheric Water-Soluble Organic  
217 Compounds at a Rural Site in China: An Enhancing Effect of NH<sub>3</sub> on SOA Formation, *Environ. Sci. Technol.*,  
218 56, 3915-3924, 10.1021/acs.est.1c06855, 2022.

219 Meng, Z., Lin, W., Zhang, R., Han, Z., and Jia, X.: Summertime ambient ammonia and its effects on ammonium  
220 aerosol in urban Beijing, China, *Sci. Total Environ.*, 579, 1521-1530, 10.1016/j.scitotenv.2016.11.159, 2017.

221 Meng, Z., Zhang, R., Lin, W., Jia, X., Yu, X., Yu, X., and Wang, G.: Seasonal Variation of Ammonia and  
222 Ammonium Aerosol at a Background Station in the Yangtze River Delta Region, China, *Aerosol Air Qual.*  
223 *Res.*, 14, 756-766, 10.4209/aaqr.2013.02.0046, 2014.

224 Meng, Z., Xu, X., Lin, W., Ge, B., Xie, Y., Song, B., Jia, S., Zhang, R., Peng, W., Wang, Y., Cheng, H., Yang, W.,  
225 and Zhao, H.: Role of ambient ammonia in particulate ammonium formation at a rural site in the North China  
226 Plain, *Atmos. Chem. Phys.*, 18, 167-184, 10.5194/acp-18-167-2018, 2018.

227 Moschos, V., Kumar, N. K., Daellenbach, K. R., Baltensperger, U., Prevot, A. S. H., and El Haddad, I.: Source  
228 Apportionment of Brown Carbon Absorption by Coupling Ultraviolet-Visible Spectroscopy with Aerosol  
229 Mass Spectrometry, *Environmental Science & Technology Letters*, 5, 302-+, 10.1021/acs.estlett.8b00118,  
230 2018.

231 Pan, Y., Tian, S., Zhao, Y., Zhang, L., Zhu, X., Gao, J., Huang, W., Zhou, Y., Song, Y., Zhang, Q., and Wang, Y.:  
232 Identifying Ammonia Hotspots in China Using a National Observation Network, *Environ. Sci. Technol.*, 52,  
233 3926-3934, 10.1021/acs.est.7b05235, 2018.

234 Paraskevopoulou, D., Kaskaoutis, D. G., Grivas, G., Bikkina, S., Tsagkaraki, M., Vrettou, I. M., Tavernaraki, K.,  
235 Papoutsidaki, K., Stavroulas, I., Liakakou, E., Bougiatioti, A., Oikonomou, K., Gerasopoulos, E., and  
236 Mihalopoulos, N.: Brown carbon absorption and radiative effects under intense residential wood burning  
237 conditions in Southeastern Europe: New insights into the abundance and absorptivity of methanol-soluble  
238 organic aerosols, *Sci. Total Environ.*, 860, 10.1016/j.scitotenv.2022.160434, 2023.

239 Soleimanian, E., Mousavi, A., Taghvaei, S., Shafer, M. M., and Sioutas, C.: Impact of secondary and primary  
240 particulate matter (PM) sources on the enhanced light absorption by brown carbon (BrC) particles in central  
241 Los Angeles, *Sci. Total Environ.*, 705, 10.1016/j.scitotenv.2019.135902, 2020.

242 Tao, Y., Sun, N., Li, X., Zhao, Z., Ma, S., Huang, H., Ye, Z., and Ge, X.: Chemical and Optical Characteristics and

243 Sources of PM<sub>2.5</sub> Humic-Like Substances at Industrial and Suburban Sites in Changzhou, China,  
 244 Atmosphere, 12, 10.3390/atmos12020276, 2021.

245 Ting, Y.-C., Ko, Y.-R., Huang, C.-H., Cheng, Y.-H., and Huang, C.-H.: Optical properties and potential sources of  
 246 water-soluble and methanol-soluble organic aerosols in Taipei, Taiwan, Atmos. Environ., 290,  
 247 10.1016/j.atmosenv.2022.119364, 2022.

248 Wang, D., Shen, Z., Zhang, Q., Lei, Y., Zhang, T., Huang, S., Sun, J., Xu, H., and Cao, J.: Winter brown carbon  
 249 over six of China's megacities: light absorption, molecular characterization, and improved source  
 250 apportionment revealed by multilayer perceptron neural network, Atmos. Chem. Phys., 22, 14893-14904,  
 251 10.5194/acp-22-14893-2022, 2022.

252 Wang, S., Nan, J., Shi, C., Fu, Q., Gao, S., Wang, D., Cui, H., Saiz-Lopez, A., and Zhou, B.: Atmospheric  
 253 ammonia and its impacts on regional air quality over the megacity of Shanghai, China, Sci. Rep., 5,  
 254 10.1038/srep15842, 2015.

255 Wen, H., Zhou, Y., Xu, X., Wang, T., Chen, Q., Chen, Q., Li, W., Wang, Z., Huang, Z., Zhou, T., Shi, J., Bi, J., Ji,  
 256 M., and Wang, X.: Water-soluble brown carbon in atmospheric aerosols along the transport pathway of Asian  
 257 dust: Optical properties, chemical compositions, and potential sources, Sci. Total Environ., 789,  
 258 10.1016/j.scitotenv.2021.147971, 2021.

259 Wu, C., Cao, C., Li, J., Lv, S., Li, J., Liu, X., Zhang, S., Liu, S., Zhang, F., Meng, J., and Wang, G.: Different  
 260 physicochemical behaviors of nitrate and ammonium during transport: a case study on Mt. Hua, China, Atmos.  
 261 Chem. Phys., 22, 15621-15635, 10.5194/acp-22-15621-2022, 2022.

262 Wu, C., Wang, G., Li, J., Li, J., Cao, C., Ge, S., Xie, Y., Chen, J., Liu, S., Du, W., Zhao, Z., and Cao, F.: Non-  
 263 agricultural sources dominate the atmospheric NH<sub>3</sub> in Xi'an, a megacity in the semi-arid region of China, Sci.  
 264 Total Environ., 722, 137756, 10.1016/j.scitotenv.2020.137756, 2020a.

265 Wu, C., Lv, S., Wang, F., Liu, X., Li, J., Liu, L., Zhang, S., Du, W., Liu, S., Zhang, F., Li, J., Meng, J., and Wang,  
 266 G.: Ammonia in urban atmosphere can be substantially reduced by vehicle emission control: A case study in  
 267 Shanghai, China, J. Environ. Sci., 126, 754-760, 10.1016/j.jes.2022.04.043, 2023.

268 Wu, C., Wang, G., Li, J., Li, J., Cao, C., Ge, S., Xie, Y., Chen, J., Li, X., Xue, G., Wang, X., Zhao, Z., and Cao, F.:  
 269 The characteristics of atmospheric brown carbon in Xi'an, inland China: sources, size distributions and optical  
 270 properties, Atmos. Chem. Phys., 20, 2017-2030, 10.5194/acp-20-2017-2020, 2020b.

271 Wu, G., Wan, X., Ram, K., Li, P., Liu, B., Yin, Y., Fu, P., Loewen, M., Gao, S., Kang, S., Kawamura, K., Wang, Y.,  
 272 and Cong, Z.: Light absorption, fluorescence properties and sources of brown carbon aerosols in the  
 273 Southeast Tibetan Plateau, Environ. Pollut., 257, 10.1016/j.envpol.2019.113616, 2020c.

274 Xie, M., Chen, X., Holder, A. L., Hays, M. D., Lewandowski, M., Offenberg, J. H., Kleindienst, T. E., Jaoui, M.,  
 275 and Hannigan, M. P.: Light absorption of organic carbon and its sources at a southeastern US location in  
 276 summer, Environ. Pollut., 244, 38-46, 10.1016/j.envpol.2018.09.125, 2019.

277 Yao, X., Ling, T. Y., Fang, M., and Chan, C. K.: Comparison of thermodynamic predictions for in situ pH in  
 278 PM<sub>2.5</sub>, Atmos. Environ., 40, 2835-2844, 10.1016/j.atmosenv.2006.01.006, 2006.

279 Zhang, Y., Xu, J., Shi, J., Xie, C., Ge, X., Wang, J., Kang, S., and Zhang, Q.: Light absorption by water-soluble  
 280 organic carbon in atmospheric fine particles in the central Tibetan Plateau, Environmental Science and  
 281 Pollution Research, 24, 21386-21397, 10.1007/s11356-017-9688-8, 2017.

282 Zhao, Y., Wu, C., Wang, Y.-q., Chen, Y.-b., Lu, S.-j., Wang, F.-l., Du, W., Liu, S.-j., Ding, Z.-j., and Wang, G.-h.:  
 283 Pollution Characteristics and Sources of Wintertime Atmospheric Brown Carbon at a Background Site of the  
 284 Yangtze River Delta Region in China, Huanjing Kexue, 42, 3127-3135, 10.13227/j.hjcx.202012002, 2021.

285 Zhu, C.-S., Cao, J.-J., Huang, R.-J., Shen, Z.-X., Wang, Q.-Y., and Zhang, N.-N.: Light absorption properties of  
 286 brown carbon over the southeastern Tibetan Plateau, Sci. Total Environ., 625, 246-251,



287 10.1016/j.scitotenv.2017.12.183, 2018.  
288 Zou, C., Cao, T., Li, M., Song, J., Jiang, B., Jia, W., Li, J., Ding, X., Yu, Z., Zhang, G., and Peng, P. a.:  
289 Measurement report: Changes in light absorption and molecular composition of water-soluble humic-like  
290 substances during a winter haze bloom-decay process in Guangzhou, China, *Atmos. Chem. Phys.*, 23, 963-979,  
291 10.5194/acp-23-963-2023, 2023.  
292
